# Supplementary material
Source: PubMed Central journal article supplement (PMC4646304)
Supplement: supp_M115.676635_jbc.M115.676635-1.pdf [file supp_M115.676635_jbc.M115.676635-1.pdf]

**Supplemental Materials**

Rapid fine conformational epitope mapping using comprehensive mutagenesis and deep sequencing

**Authors: Caitlin A. Kowalsky<sup>1</sup>, Matthew S. Faber<sup>2</sup>, Aritro Nath<sup>3</sup>, Hailey E. Dann<sup>1</sup>, Vince W. Kelly<sup>1</sup>,  
Li Liu<sup>4</sup>, Purva Shanker<sup>1</sup>, Ellen K. Wagner<sup>5</sup>, Jennifer A. Maynard<sup>5</sup>, Christina Chan<sup>1,2,3</sup>, and  
Timothy A. Whitehead<sup>1,6,\*</sup>**

<sup>1</sup> Department of Chemical Engineering and Materials Science, Michigan State University, East Lansing, Michigan, USA

<sup>2</sup> Department of Biochemistry and Molecular Biology, Michigan State University, East Lansing, Michigan, USA

<sup>3</sup> Genetics Graduate Program, Michigan State University, East Lansing, Michigan, USA

<sup>4</sup> Department of Microbiology and Molecular Genetics, Michigan State University, USA

<sup>5</sup> Department of Chemical Engineering, University of Texas, Austin, Texas, USA

<sup>6</sup> Department of Biosystems and Agricultural Engineering, Michigan State University, East Lansing, Michigan, USA

\*Running title: *Rapid fine comprehensive conformational epitope mapping*

To whom correspondence should be addressed: Timothy A. Whitehead, Department of Chemical Engineering and Materials Science, Michigan State University, 428 S. Shaw Lane East Lansing, MI, USA, Tel: (517) 432-2097, Email: [taw@egr.msu.edu](mailto:taw@egr.msu.edu)

**Keywords:** conformational epitope mapping, protein-protein interactions, TROP2, Tumor Necrosis Factor, Bordetella Pertussis

---

**Supporting Figures.**

Rapid fine comprehensive conformational epitope mapping

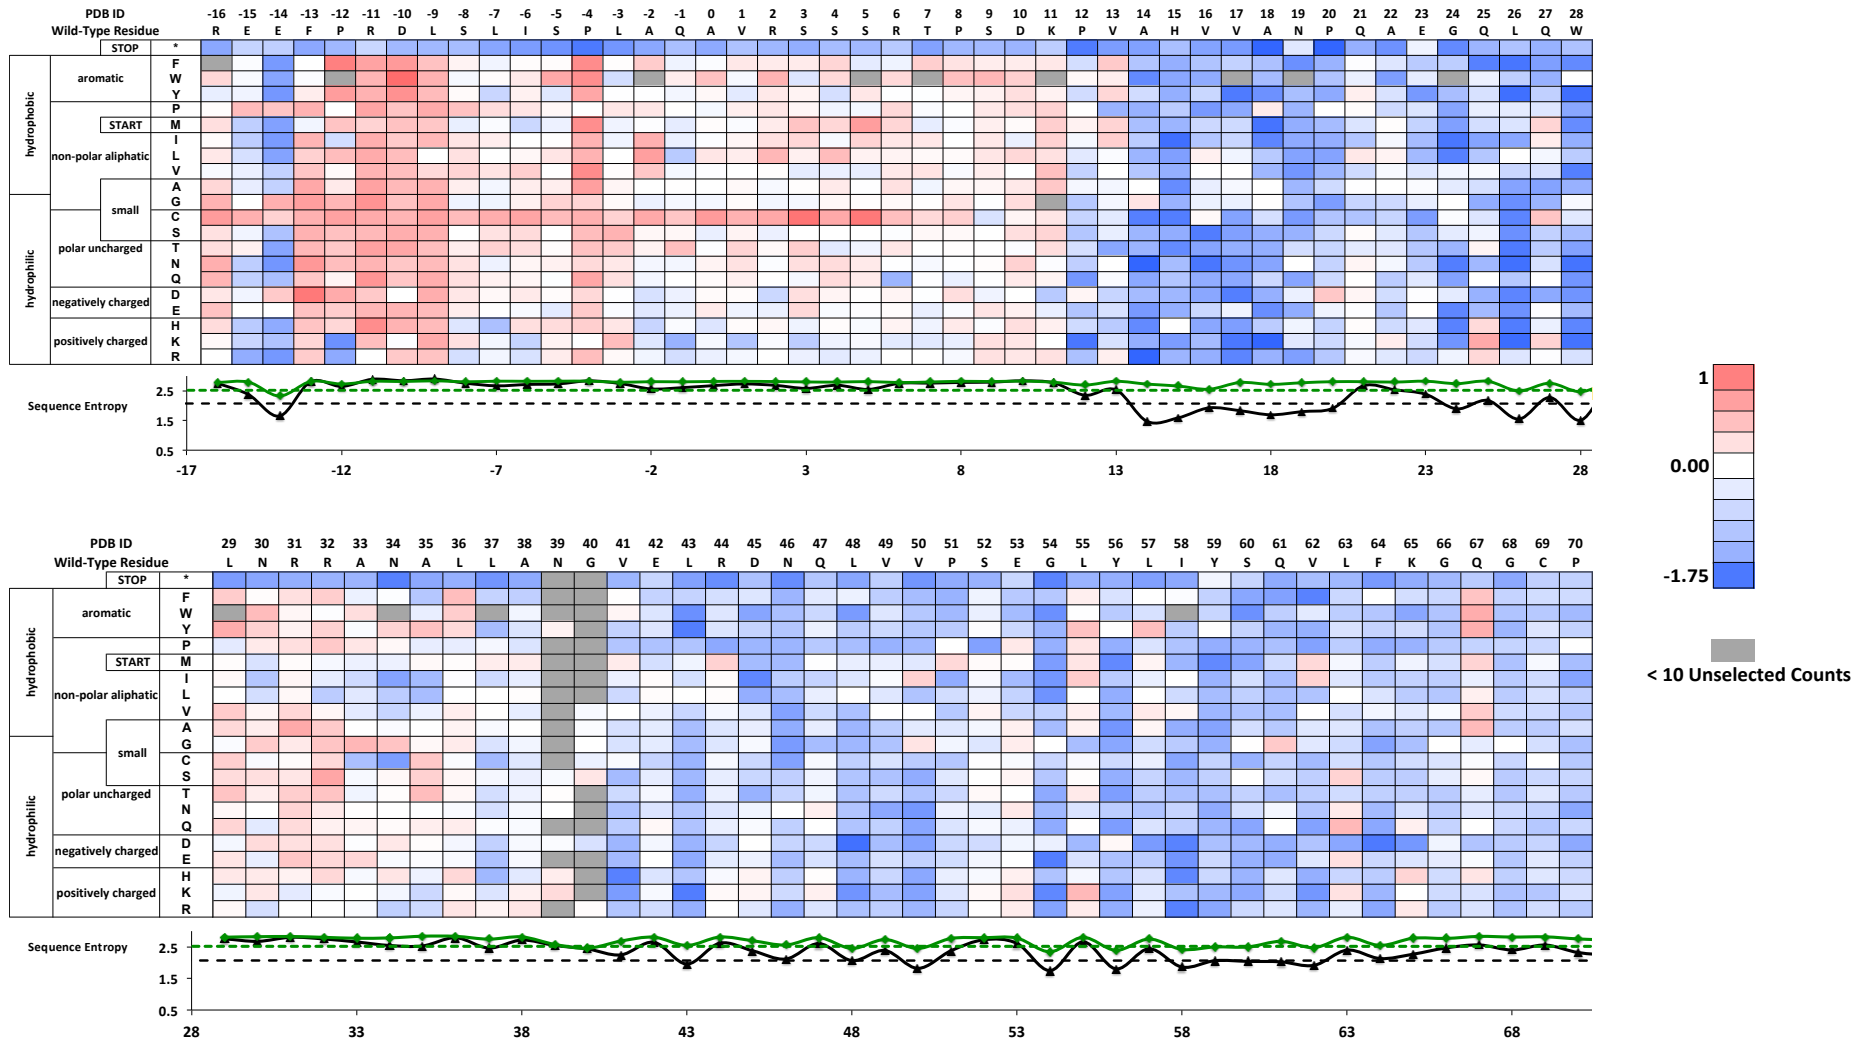

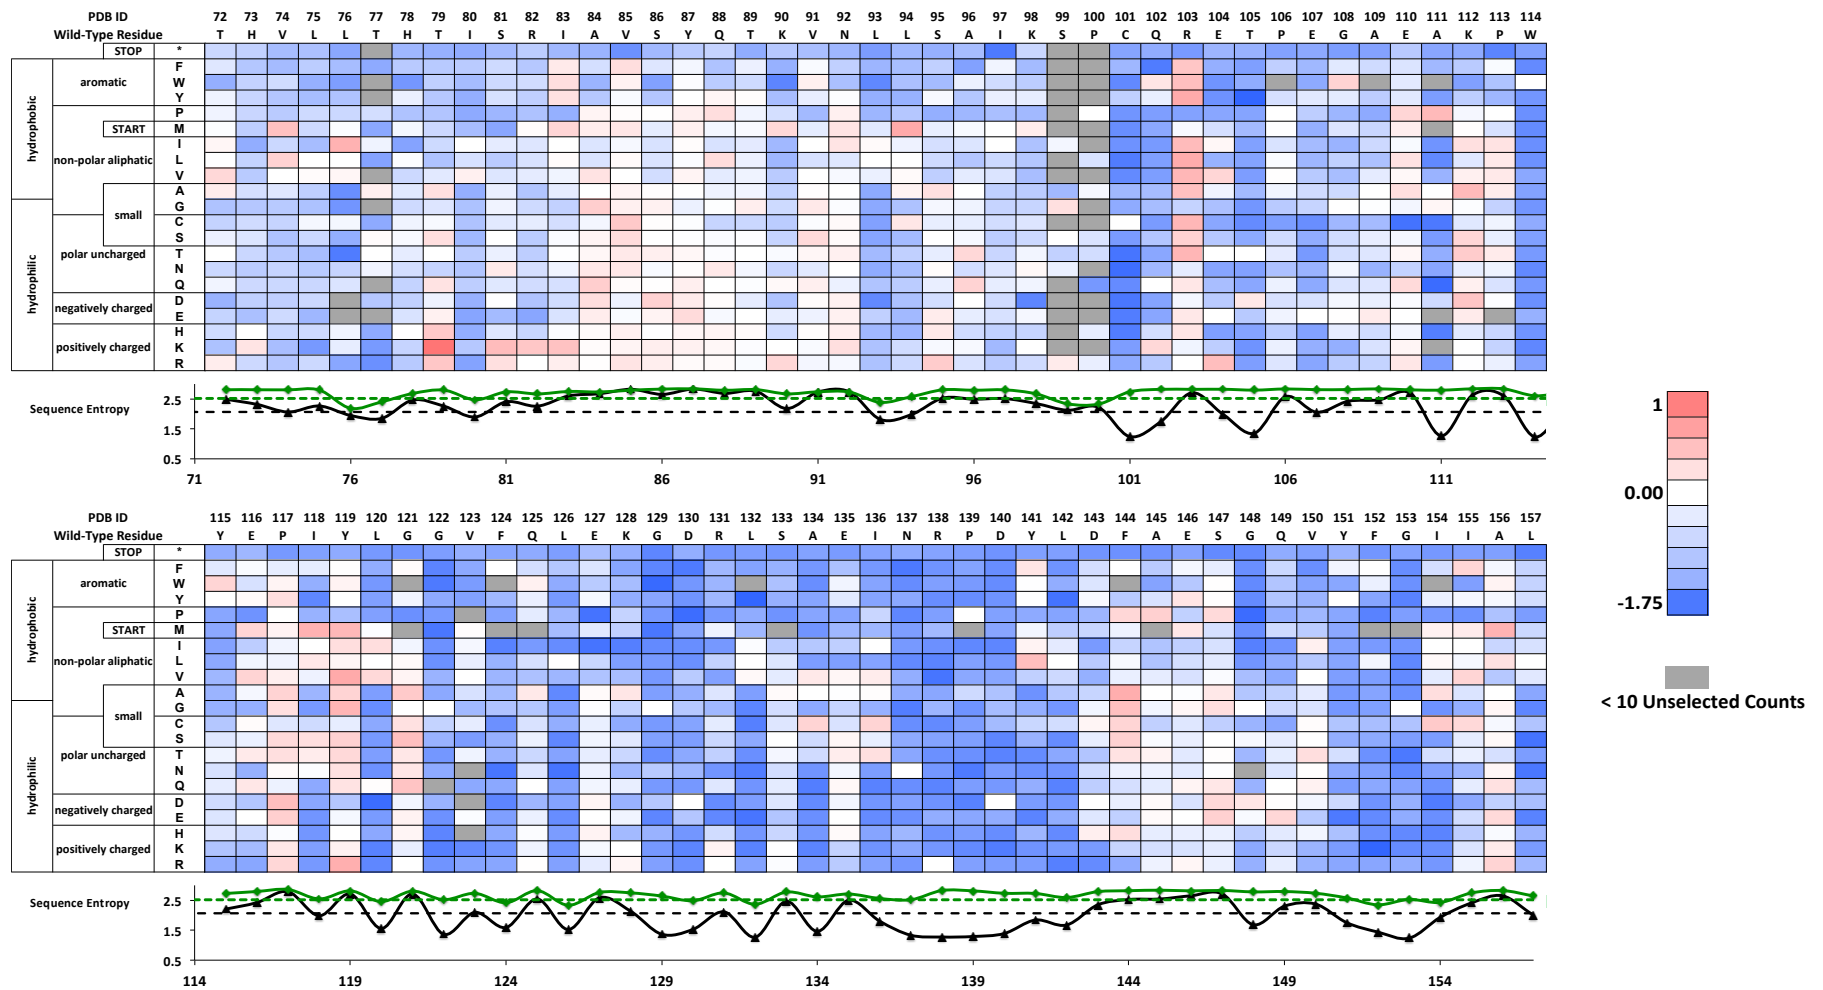

**Supplementary Figure 1. TNF-Inflix\_scFv Conformational Epitope Determination.**

Heatmap of fitness metric of bound vs. unselected population for all possible single non-synonymous mutations in the coding sequence for extracellular TNF. Sequence entropy for the unselected/display population (green) and unselected/bound population (black) is plotted below with their respective cut-offs (dashed lines).

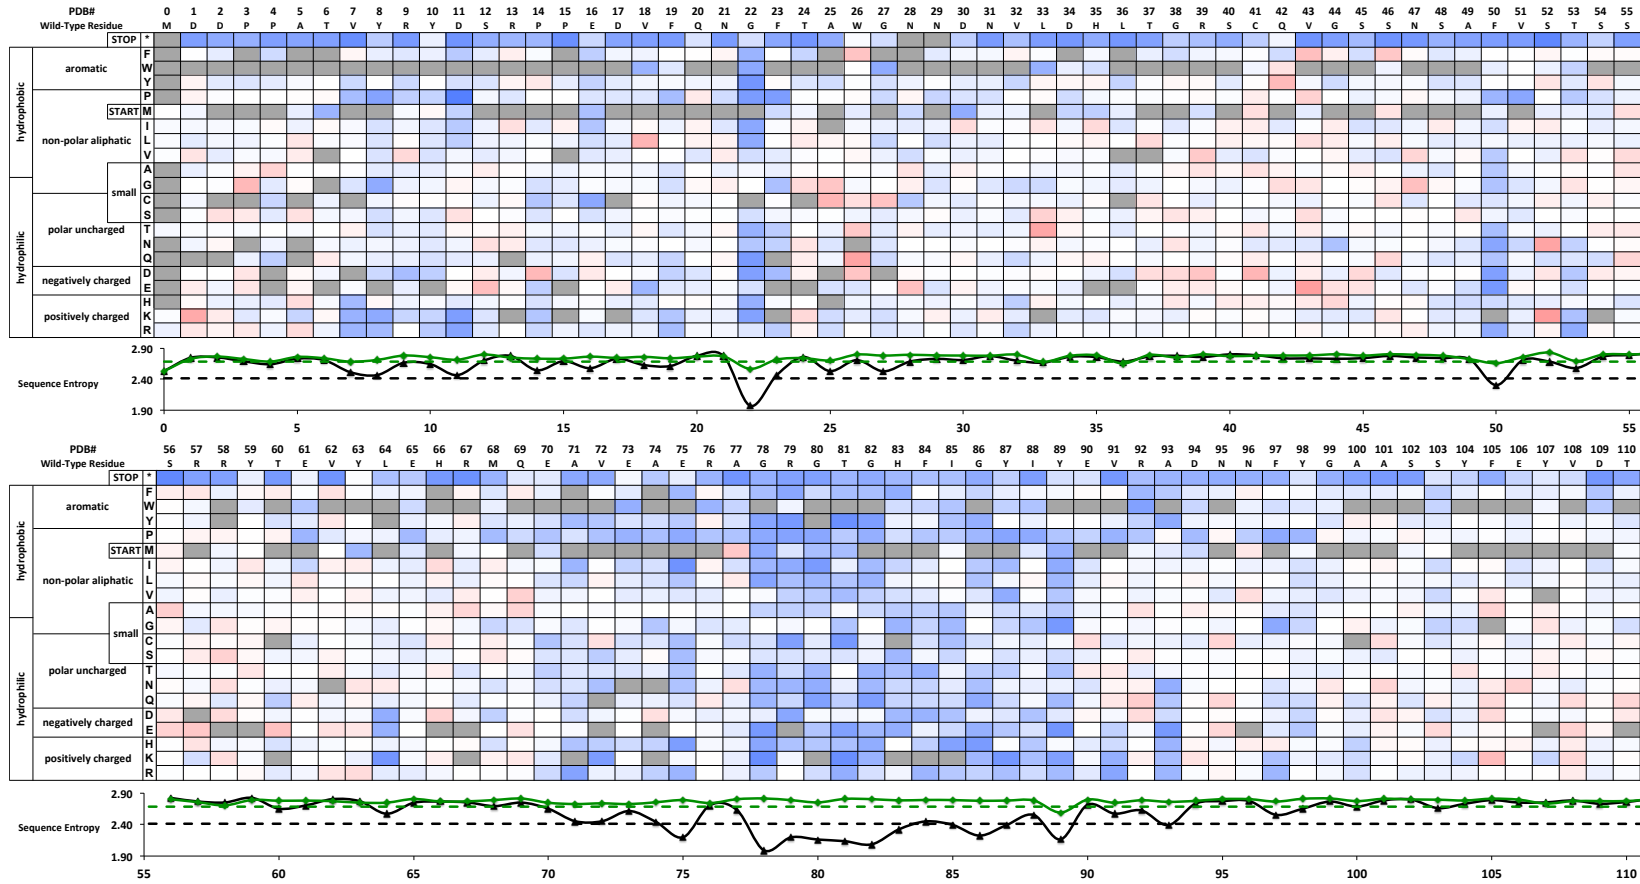

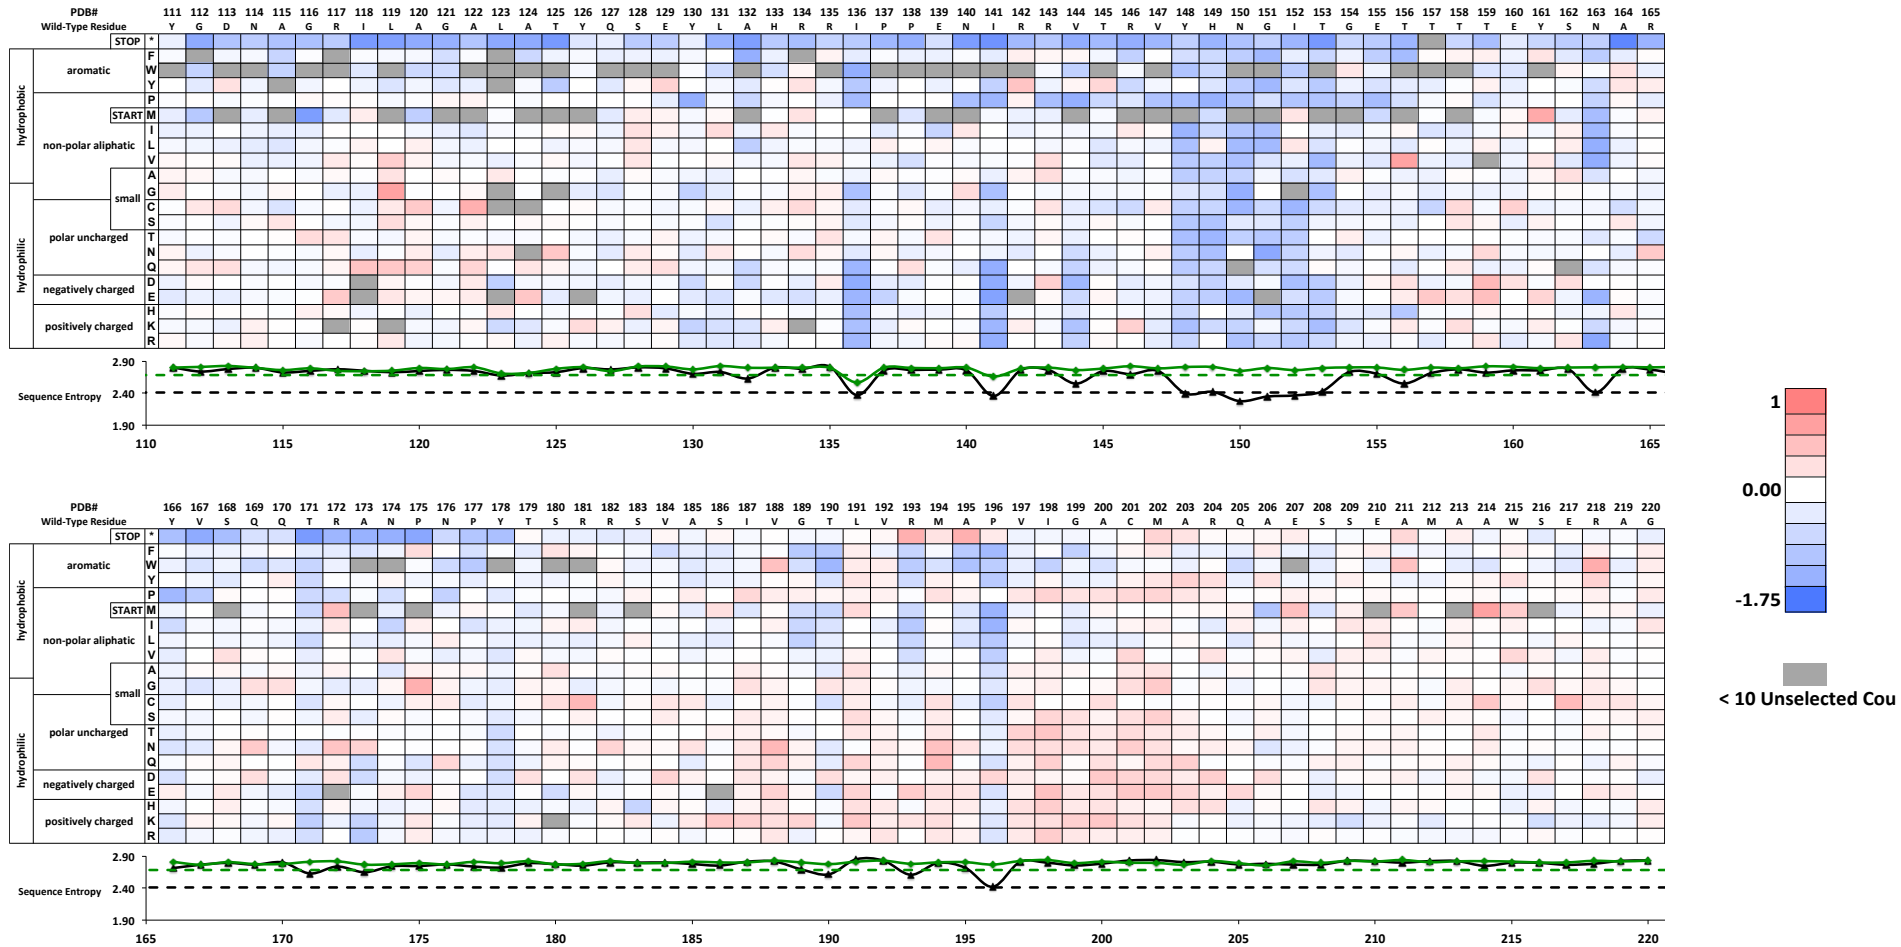

**Supplementary Figure 2. PTx-S1-220-hu1B7 Conformational Epitope Determination.**

Heatmap of fitness metric of bound vs. unselected population for all possible single non-synonymous mutations in the coding sequence for Asp1-Gly220 of PTx-S1. Sequence entropy for the unselected/display population (green) and unselected/bound population (black) is plotted below with their respective cut-offs (dashed lines).

Rapid fine comprehensive conformational epitope mapping

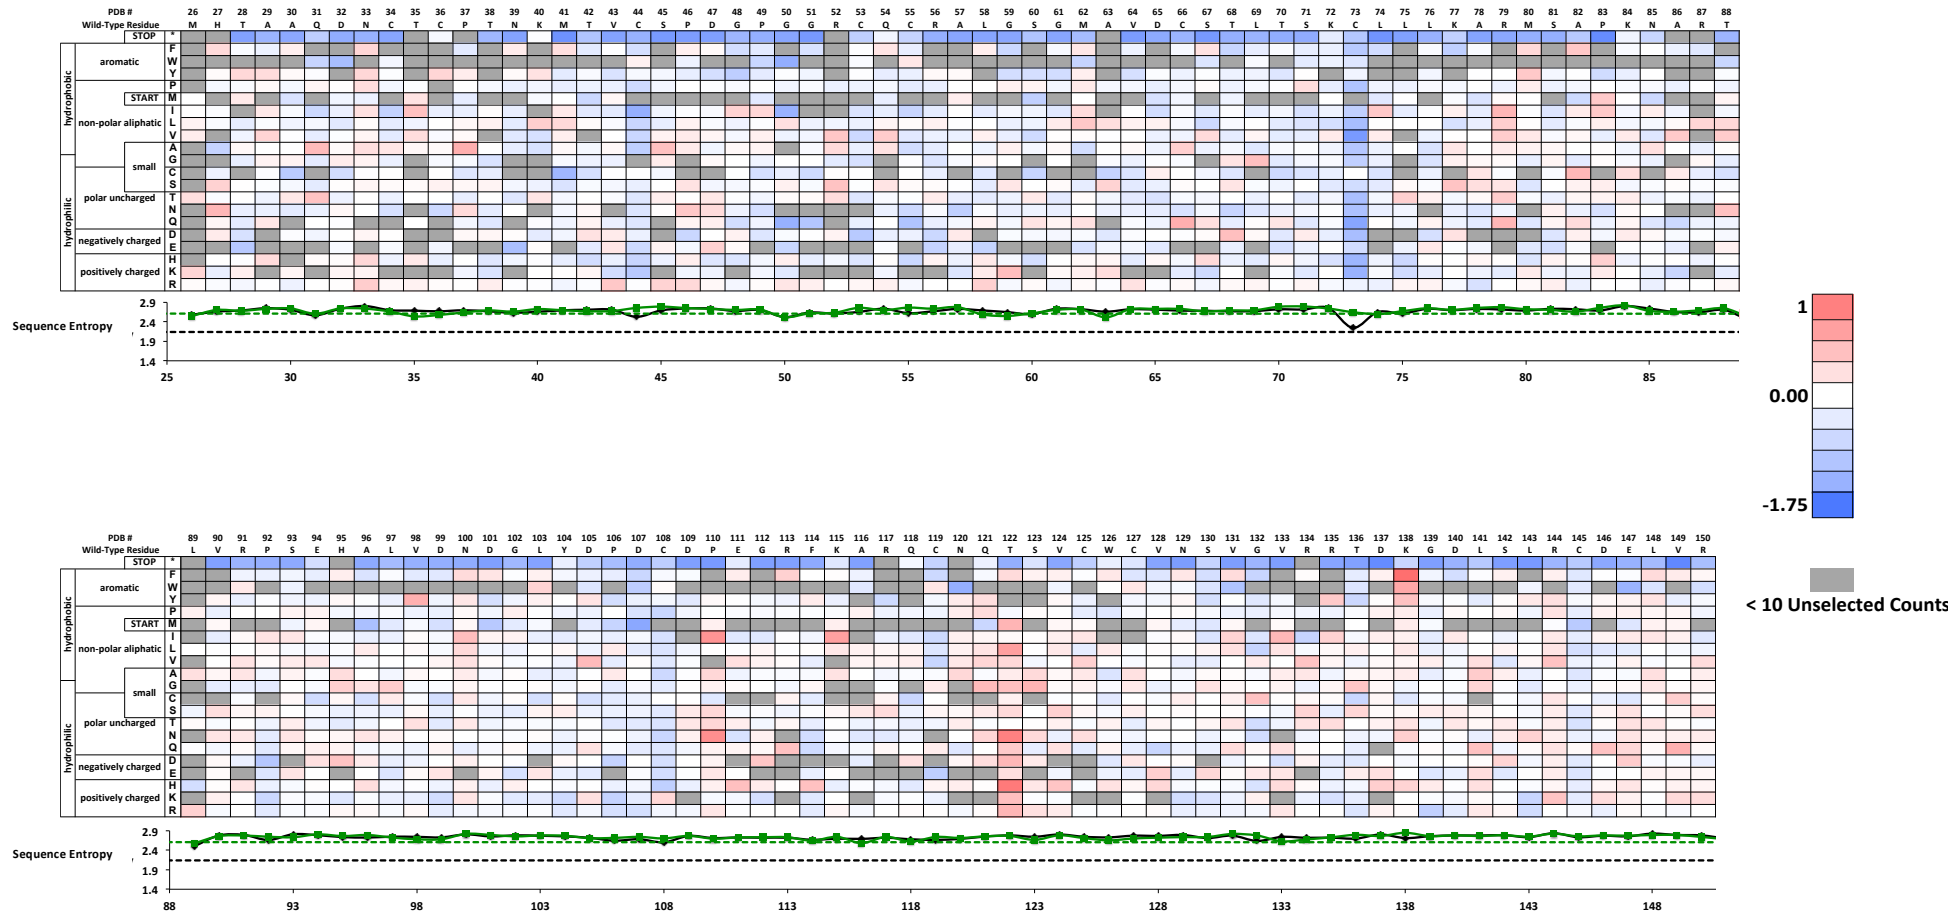

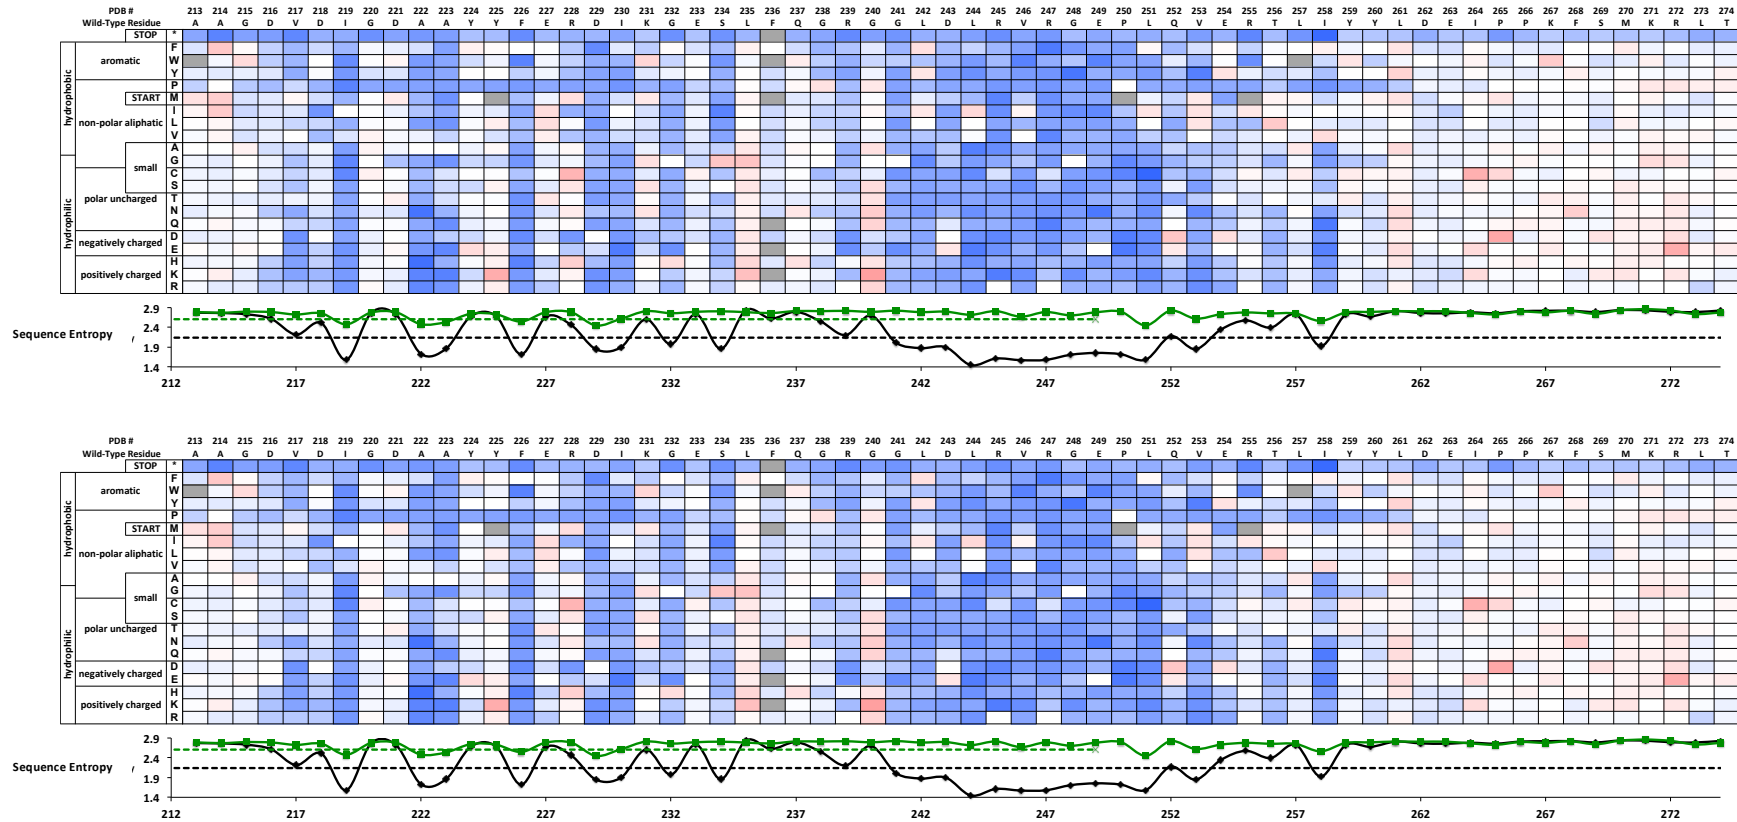

**Supplementary Figure 3. TROP2-m7e6 Conformational Epitope Determination.**

Heatmap of fitness metric of bound vs. unselected population for all possible single non-synonymous mutations in the coding sequence for TROP2Ex. Sequence entropy for the unselected/display population (green) and unselected/bound population (black) is plotted below with their respective cut-offs (dashed lines).



**Supplementary Table 1. Sorting Statistics**

|                       | <b>Tile Length (AA)</b> | <b>Minimum Transformants for 99.9% Coverage</b> | <b>Sort Labeling Conditions (nM)</b> | <b>Events Collected for Binding Population</b> | <b>Percent Sorted (Display)</b> | <b>Percent Sorted (Binding)</b> |
|-----------------------|-------------------------|-------------------------------------------------|--------------------------------------|------------------------------------------------|---------------------------------|---------------------------------|
| TNF-Infliximab Tile 1 | 60                      | 26,880                                          | 32                                   | 200,641                                        | 46.0%                           | 6.9%                            |
| TNF-Infliximab Tile 2 | 60                      | 26,880                                          | 32                                   | 200,437                                        | 43.0%                           | 5.1%                            |
| TNF-Infliximab Tile 3 | 57                      | 25,536                                          | 32                                   | 206,251                                        | 31.9%                           | 6.5%                            |
| PTxS1-hu1B7 Tile 1    | 72                      | 32,256                                          | 3                                    | 400,000                                        | 43.0%                           | 7.7 %                           |
| PTxS1-hu1B7 Tile 2    | 74                      | 33,152                                          | 3                                    | 400,000                                        | 45.0%                           | 6.1%                            |
| cdPTxS1-hu1B7 Tile 3  | 73                      | 32,704                                          | 3                                    | 400,000                                        | 46.2%                           | 6.4%                            |
| Trop2-m7E6 Tile 1     | 82                      | 36,736                                          | 22                                   | 400,000                                        | 19.8%                           | 6.6%                            |
| Trop2-m7E6 Tile 2     | 83                      | 37,184                                          | 22                                   | 400,000                                        | 24.7%                           | 6.7%                            |
| Trop2-m7E6 Tile 3     | 83                      | 37,184                                          | 22                                   | 400,000                                        | 16.9%                           | 6.6%                            |

**Supplementary Table 2. Library Statistics**

|                                                            | TNF    |         |         | PTxS1  |        |         | Trop2  |        |        |
|------------------------------------------------------------|--------|---------|---------|--------|--------|---------|--------|--------|--------|
|                                                            | Tile 1 | Tile 2  | Tile 3  | Tile 1 | Tile 2 | Tile 3  | Tile 1 | Tile 2 | Tile 3 |
| Reads passing through enrich                               | 895912 | 1594215 | 1018624 | 428831 | 447909 | 1610608 | 401980 | 523168 | 657434 |
| <b>Percent of possible codon substitutions observed</b>    |        |         |         |        |        |         |        |        |        |
| 1-base substitution                                        | 99.8%  | 100.0%  | 99.6%   | 100.0% | 100.0% | 100.0%  | 99.6%  | 99.9%  | 100.0% |
| 2-base substitutions                                       | 92.0%  | 96.0%   | 95.4%   | 94.3%  | 96.9%  | 99.0%   | 87.3%  | 96.1%  | 99.2%  |
| 3-base substitutions                                       | 91.0%  | 94.8%   | 91.3%   | 91.7%  | 96.7%  | 95.6%   | 81.0%  | 95.4%  | 98.4%  |
| All substitutions                                          | 92.7%  | 96.1%   | 94.2%   | 94.0%  | 97.2%  | 97.8%   | 86.4%  | 96.3%  | 98.9%  |
| <b>Percent of reads with</b>                               |        |         |         |        |        |         |        |        |        |
| No nonsynonymous mutations                                 | 15.9%  | 44.1%   | 10.4%   | 16.0%  | 20.9%  | 28.4%   | 8.2%   | 7.3%   | 14.7%  |
| One nonsynonymous mutation                                 | 62.9%  | 45.8%   | 75.6%   | 32.7%  | 36.0%  | 42.2%   | 31.0%  | 26.5%  | 56.7%  |
| Multiple nonsynonymous mutations                           | 21.2%  | 10.1%   | 14.0%   | 51.3%  | 43.1%  | 29.4%   | 60.8%  | 66.2%  | 28.6%  |
| <b>Coverage of possible single nonsynonymous mutations</b> | 93.6%  | 97.1%   | 97.2%   | 94.7%  | 96.8%  | 98.7%   | 90.2%  | 97.1%  | 99.5%  |

**Supplementary Table 3. Primer Sequences used for deep sequencing.** Each primer is listed as X\_Y\_Z, where X is the gene name, Y is the Tile (T1=Tile 1, etc), and F/R denotes forward or reverse reads, respectively.

| Primer Name | Sequence                                           |
|-------------|----------------------------------------------------|
| TNFa_T1_F   | G TTCAGAGTTCTACAGTCCGACGATCTCGGCTAGCCATATG         |
| TNFa_T1_R   | CCTTGGCACCCGAGAATCCAAGCTGGTTGTCCCTCAGCTC           |
| TNFa_T2_F   | G TTCAGAGTTCTACAGTCCGACGATCACGCCCTGCTGG            |
| TNFa_T2_R   | CCTTGGCACCCGAGAATCCAGGGTCTCCCTCTGG                 |
| TNFa_T3_F   | G TTCAGAGTTCTACAGTCCGACGATCGAGCGCCATCAAGA          |
| TNFa_T3_R   | CCTTGGCACCCGAGAATCCATTACATCTACACTGTTGTTATCA        |
| pETCON_T1_F | G TTCAGAGTTCTACAGTCCGACGATCGGGTTCGGCTAGCCATATG     |
| pETCON_TE_R | CCTTGGCACCCGAGAATCCAGCCCCCTCGAG                    |
| PTxS1_T1_R  | CCTTGGCACCCGAGAATCCAAAGTGGCCGGTGCCC                |
| PTxS1_T2_F  | G TTCAGAGTTCTACAGTCCGACGATCAGGAAGCGGTCGAG          |
| PTxS1_T2_R  | CCTTGGCACCCGAGAATCCAGTGATGCCGTTGTGATA              |
| PTxS1_T3_F  | G TTCAGAGTTCTACAGTCCGACGATCGGGTAACGCGGGTC          |
| Trop2_T1_R  | CCTTGGCACCCGAGAATCCAGCGCGCCTTGAAGC                 |
| Trop2_T2_F  | G TTCAGAGTTCTACAGTCCGACGATCCGATGGCCTCTACGAC        |
| Trop2_T2_R  | CCTTGGCACCCGAGAATCCACTCGTAGTGCACGGC                |
| Trop2_T3_F  | G TTCAGAGTTCTACAGTCCGACGATCCACCCAAGTTCGTG          |
| Trop2amp_F  | G CATCATATGCACACGGCCGCGCAGGACA ACTGCACGTG          |
| Trop2amp_R  | CAGGCTCGAGGGTGAGGCGCTTCATGGAGAACTTCGGGGGAATCTCG    |
| PTxS1amp_F  | G CGGTAGCGGAGGCGGAGGGTCGGCTAGCCATATGGACGATCCTCCCGC |
| PTxS1amp_R  | CAGAAATAAGCTTTTGTTCGGATCCGCCCCCTCGAGGCCGGCGCGT     |
